# Supplementary material for: CDCA5 promotes the progression of breast cancer and serves as a potential prognostic biomarker
Source: PubMed Central journal article supplement — Oncol Rep. 2022 Aug 16;48(4):172. doi: 10.3892/or.2022.8387 (PMC9478967; doi:10.3892/or.2022.8387), 2022-08-16
Supplement: Supplementary_Data1.pdf [file Supplementary_Data1.pdf]

**Table S1. The Cancer Genome Atlas pan-cancer abbreviations and noun comparisons.**

| Abbreviation | Full name                             | Abbreviation | Full name                             |
|--------------|---------------------------------------|--------------|---------------------------------------|
| BLCA         | Bladder urothelial carcinoma          | BRCA         | Breast invasive carcinoma             |
| CHOL         | Cholangiocarcinoma                    | CESC         | Cervical squamous cell carcinoma      |
| ESCA         | Esophageal carcinoma                  | COAD         | Colon adenocarcinoma                  |
| HNSC         | Head and neck squamous cell carcinoma | GBM          | Glioblastoma multiforme               |
| KIRC         | Kidney renal clear cell carcinoma     | KICH         | Kidney chromophobe                    |
| LIHC         | Liver hepatocellular carcinoma        | KIRP         | Kidney renal papillary cell carcinoma |
| LUSC         | Lung squamous cell carcinoma          | LUAD         | Lung adenocarcinoma                   |
| PCPG         | Pheochromocytoma and paraganglioma    | PAAD         | Pancreatic adenocarcinoma             |
| READ         | Rectal adenocarcinoma                 | PRAD         | Prostate adenocarcinoma               |
| SKCM         | Skin cutaneous melanoma               | SARC         | Sarcoma                               |
| THYM         | Thymoma                               | STAD         | Stomach adenocarcinoma                |
| UCEC         | Uterine corpus endometrial carcinoma  | THCA         | Thyroid carcinoma                     |

**Table SII. Top 50 positive genes related to CDCA5.**

| Query  | Statistic | P-value               | FDR (BH)              | Event_SD | Event_TD |
|--------|-----------|-----------------------|-----------------------|----------|----------|
| BIRC5  | 0.864838  | 9.98012604599318e-322 | 9.999987484956e-319   | 1093     | 1093     |
| CCNB2  | 0.871072  | 9.98012604599318e-322 | 9.999987484956e-319   | 1093     | 1093     |
| CDCA5  | 1         | 9.98012604599318e-322 | 9.999987484956e-319   | 1093     | 1093     |
| CDCA8  | 0.864119  | 9.98012604599318e-322 | 9.999987484956e-319   | 1093     | 1093     |
| CENPA  | 0.866851  | 9.98012604599318e-322 | 9.999987484956e-319   | 1093     | 1093     |
| FOXM1  | 0.865191  | 9.98012604599318e-322 | 9.999987484956e-319   | 1093     | 1093     |
| KIF2C  | 0.895261  | 9.98012604599318e-322 | 9.999987484956e-319   | 1093     | 1093     |
| KIFC1  | 0.864107  | 9.98012604599318e-322 | 9.999987484956e-319   | 1093     | 1093     |
| MYBL2  | 0.866705  | 9.98012604599318e-322 | 9.999987484956e-319   | 1093     | 1093     |
| PLK1   | 0.887421  | 9.98012604599318e-322 | 9.999987484956e-319   | 1093     | 1093     |
| RAD54L | 0.861854  | 9.98012604599318e-322 | 9.999987484956e-319   | 1093     | 1093     |
| TPX2   | 0.866864  | 9.98012604599318e-322 | 9.999987484956e-319   | 1093     | 1093     |
| CDC45  | 0.860325  | 1.48219693752374e-321 | 2.29797342865451e-318 | 1093     | 1093     |
| AURKB  | 0.857087  | 1.54441403142575e-316 | 2.22340462883446e-313 | 1093     | 1093     |
| UBE2C  | 0.856798  | 4.28056222617511e-316 | 5.75164877790396e-313 | 1093     | 1093     |
| MCM10  | 0.855651  | 2.37052695886499e-314 | 2.98612317849512e-311 | 1093     | 1093     |
| RAD51  | 0.855389  | 5.917996349484e-314   | 7.01630684846188e-311 | 1093     | 1093     |
| CDC20  | 0.854926  | 2.95355827986925e-313 | 3.30716484059806e-310 | 1093     | 1093     |
| HJURP  | 0.853572  | 3.153686569499e-311   | 3.35E-308             | 1093     | 1093     |
| ORC1L  | 0.851392  | 5.28E-308             | 5.32E-305             | 1093     | 1093     |
| KIF4A  | 0.848759  | 3.53E-304             | 3.38E-301             | 1093     | 1093     |
| NCAPH  | 0.848603  | 5.91E-304             | 5.41E-301             | 1093     | 1093     |
| CCNA2  | 0.845226  | 3.68E-299             | 3.23E-296             | 1093     | 1093     |
| MELK   | 0.842471  | 2.47E-295             | 2.08E-292             | 1093     | 1093     |
| KIF18B | 0.841213  | 1.31E-293             | 1.05E-290             | 1093     | 1093     |
| SKA1   | 0.840558  | 1.02E-292             | 7.90E-290             | 1093     | 1093     |
| TROAP  | 0.837104  | 4.38E-288             | 3.27E-285             | 1093     | 1093     |

|          |          |           |           |      |      |
|----------|----------|-----------|-----------|------|------|
| CEP55    | 0.833159 | 6.36E-283 | 4.58E-280 | 1093 | 1093 |
| GTSE1    | 0.831427 | 1.07E-280 | 7.41E-278 | 1093 | 1093 |
| C15orf42 | 0.830835 | 6.05E-280 | 4.06E-277 | 1093 | 1093 |
| NCAPG    | 0.830457 | 1.83E-279 | 1.19E-276 | 1093 | 1093 |
| CDC25A   | 0.828627 | 3.71E-277 | 2.34E-274 | 1093 | 1093 |
| BUB1     | 0.826403 | 2.17E-274 | 1.32E-271 | 1093 | 1093 |
| FEN1     | 0.82525  | 5.71E-273 | 3.38E-270 | 1093 | 1093 |
| CDCA3    | 0.825164 | 7.27E-273 | 4.19E-270 | 1093 | 1093 |
| AURKA    | 0.823999 | 1.92E-271 | 1.08E-268 | 1093 | 1093 |
| FAM83D   | 0.822502 | 1.25E-269 | 6.80E-267 | 1093 | 1093 |
| EXO1     | 0.822069 | 4.16E-269 | 2.20E-266 | 1093 | 1093 |
| MAD2L1   | 0.820522 | 2.94E-267 | 1.52E-264 | 1093 | 1093 |
| TRIP13   | 0.817657 | 7.07E-264 | 3.56E-261 | 1093 | 1093 |
| FAM64A   | 0.814416 | 4.00E-260 | 1.97E-257 | 1093 | 1093 |
| ESPL1    | 0.813667 | 2.87E-259 | 1.38E-256 | 1093 | 1093 |
| E2F1     | 0.812585 | 4.90E-258 | 2.29E-255 | 1093 | 1093 |
| NDC80    | 0.809885 | 5.32E-255 | 2.44E-252 | 1093 | 1093 |
| E2F2     | 0.807177 | 5.30E-252 | 2.37E-249 | 1093 | 1093 |
| DLGAP5   | 0.804761 | 2.28E-249 | 9.99E-247 | 1093 | 1093 |
| SGOL1    | 0.804482 | 4.57E-249 | 1.96E-246 | 1093 | 1093 |
| OIP5     | 0.802515 | 5.94E-247 | 2.49E-244 | 1093 | 1093 |
| ORC6L    | 0.802444 | 7.09E-247 | 2.91E-244 | 1093 | 1093 |
| PTTG1    | 0.800666 | 5.49E-245 | 2.21E-242 | 1093 | 1093 |

**Table SIII. Top 50 negative genes related to CDCA5.**

| Query    | Statistic | P-value   | FDR (BH)  | Event_SD | Event_TD |
|----------|-----------|-----------|-----------|----------|----------|
| KLHDC1   | -0.6494   | 6.57E-132 | 7.23E-130 | 1093     | 1093     |
| ZBTB4    | -0.64548  | 7.71E-130 | 8.26E-128 | 1093     | 1093     |
| NOSTRIN  | -0.64516  | 1.14E-129 | 1.21E-127 | 1093     | 1093     |
| CYBRD1   | -0.62809  | 5.38E-121 | 5.29E-119 | 1093     | 1093     |
| C7orf63  | -0.62715  | 1.56E-120 | 1.52E-118 | 1093     | 1093     |
| APH1B    | -0.61343  | 5.68E-114 | 5.23E-112 | 1093     | 1093     |
| C5orf53  | -0.61048  | 1.33E-112 | 1.20E-110 | 1093     | 1093     |
| TENC1    | -0.60083  | 3.22E-108 | 2.78E-106 | 1093     | 1093     |
| C14orf45 | -0.58888  | 5.36E-103 | 4.32E-101 | 1093     | 1093     |
| PDGFD    | -0.58836  | 8.92E-103 | 7.16E-101 | 1093     | 1093     |
| CALCOCO1 | -0.58691  | 3.69E-102 | 2.93E-100 | 1093     | 1093     |
| C5orf36  | -0.58093  | 1.21E-99  | 9.46E-98  | 1093     | 1093     |
| CRY2     | -0.57474  | 4.28E-97  | 3.25E-95  | 1093     | 1093     |
| KIF13B   | -0.57421  | 7.05E-97  | 5.33E-95  | 1093     | 1093     |
| DNAH7    | -0.5676   | 3.19E-94  | 2.33E-92  | 1093     | 1090     |
| LRRC48   | -0.56627  | 1.08E-93  | 7.80E-92  | 1093     | 1093     |
| C9orf68  | -0.56028  | 2.39E-91  | 1.70E-89  | 1093     | 1093     |
| CX3CR1   | -0.5586   | 1.06E-90  | 7.45E-89  | 1093     | 1092     |
| NEK10    | -0.55745  | 2.95E-90  | 2.04E-88  | 1093     | 1084     |
| FAM47E   | -0.55673  | 5.59E-90  | 3.84E-88  | 1093     | 1093     |
| UBXN10   | -0.5558   | 1.26E-89  | 8.58E-88  | 1093     | 1091     |
| C10orf32 | -0.55235  | 2.58E-88  | 1.73E-86  | 1093     | 1093     |
| RAI2     | -0.55183  | 4.06E-88  | 2.70E-86  | 1093     | 1093     |
| CASC1    | -0.54786  | 1.24E-86  | 8.08E-85  | 1093     | 1090     |
| NTN4     | -0.54599  | 6.09E-86  | 3.92E-84  | 1093     | 1093     |
| CCNDBP1  | -0.54575  | 7.51E-86  | 4.82E-84  | 1093     | 1093     |
| MEIS3P1  | -0.53852  | 3.25E-83  | 2.02E-81  | 1093     | 1093     |

|            |          |          |          |      |      |
|------------|----------|----------|----------|------|------|
| ITM2B      | -0.53631 | 2.01E-82 | 1.24E-80 | 1093 | 1093 |
| GTF2IRD2P1 | -0.53504 | 5.71E-82 | 3.50E-80 | 1093 | 1093 |
| RAPGEF3    | -0.53426 | 1.09E-81 | 6.61E-80 | 1093 | 1093 |
| FMO5       | -0.53155 | 9.84E-81 | 5.87E-79 | 1093 | 1093 |
| CAPN8      | -0.52997 | 3.53E-80 | 2.08E-78 | 1093 | 1065 |
| GTF2IRD2   | -0.5298  | 4.05E-80 | 2.39E-78 | 1093 | 1093 |
| NEK11      | -0.52816 | 1.51E-79 | 8.85E-78 | 1093 | 1093 |
| C10orf26   | -0.52815 | 1.52E-79 | 8.87E-78 | 1093 | 1093 |
| CYB5D2     | -0.52775 | 2.09E-79 | 1.21E-77 | 1093 | 1093 |
| CPEB2      | -0.52652 | 5.57E-79 | 3.19E-77 | 1093 | 1093 |
| ZNF763     | -0.5265  | 5.66E-79 | 3.23E-77 | 1093 | 1093 |
| FBXL17     | -0.5256  | 1.17E-78 | 6.62E-77 | 1093 | 1093 |
| ABCG2      | -0.52366 | 5.37E-78 | 3.01E-76 | 1093 | 1093 |
| CACNA1D    | -0.52358 | 5.76E-78 | 3.22E-76 | 1093 | 1093 |
| FRY        | -0.52328 | 7.30E-78 | 4.06E-76 | 1093 | 1093 |
| FANK1      | -0.52245 | 1.40E-77 | 7.74E-76 | 1093 | 1092 |
| HNMT       | -0.52239 | 1.47E-77 | 8.10E-76 | 1093 | 1093 |
| EFCAB6     | -0.52226 | 1.62E-77 | 8.95E-76 | 1093 | 1090 |
| TIGD6      | -0.52161 | 2.71E-77 | 1.49E-75 | 1093 | 1093 |
| PRICKLE2   | -0.52152 | 2.89E-77 | 1.58E-75 | 1093 | 1093 |
| ABAT       | -0.52124 | 3.60E-77 | 1.97E-75 | 1093 | 1093 |
| CBX7       | -0.52086 | 4.88E-77 | 2.66E-75 | 1093 | 1093 |
| LZTFL1     | -0.51842 | 3.26E-76 | 1.75E-74 | 1093 | 1093 |
